# Supplementary material for: Annoyance, Sleep and Concentration Problems due to Combined Traffic Noise and the Benefit of Quiet Side
Source: PubMed Central journal article supplement (PMC4344683; doi:10.3390/ijerph120201612), 2015-01-29
Supplement: ijerph-12-01612-s001.pdf [file ijerph-12-01612-s001.pdf]

## Annoyance, Sleep and Concentration Problems due to Combined Traffic Noise and the Benefit of Quiet Side

**Table S1.** Proportion annoyed due to road traffic or railway noise based on objective and subjective access to quiet side percent (n).

| <b>L<sub>Aeq24h</sub> dB(A)<br/>COMBINED</b>  |     | <b>&lt;40</b> | <b>40–44</b> | <b>45–49</b> | <b>50–54</b> | <b>55–59</b> | <b>≥60</b> | <b>Total</b> |
|-----------------------------------------------|-----|---------------|--------------|--------------|--------------|--------------|------------|--------------|
| Annoyed (total)                               |     | 4% (4)        | 7% (32)      | 20% (124)    | 32% (199)    | 43% (259)    | 65% (82)   | 27% (700)    |
| Window(s)<br>facing green<br>space            | No  | 5% (1)        | 8% (7)       | 32% (51)     | 47% (91)     | 54% (105)    | 75% (39)   | 42% (294)    |
|                                               | Yes | 3% (3)        | 6% (25)      | 16% (71)     | 25% (108)    | 39% (154)    | 58% (42)   | 22% (403)    |
|                                               |     |               |              | *            | *            | *            |            | *            |
| Bedroom<br>window facing<br>green space       | No  | 4% (1)        | 13% (15)     | 31% (69)     | 50% (126)    | 52% (149)    | 71% (57)   | 42% (417)    |
|                                               | Yes | 4% (3)        | 5% (17)      | 14% (53)     | 19% (69)     | 35% (105)    | 56% (25)   | 18% (272)    |
|                                               |     |               | *            | *            | *            | *            |            | *            |
| Subjective<br>access to quiet<br>indoor space | No  | 15% (2)       | 16% (12)     | 35% (77)     | 50% (140)    | 57% (183)    | 79% (62)   | 48% (476)    |
|                                               | Yes | 2% (2)        | 5% (20)      | 11% (44)     | 17% (57)     | 27% (74)     | 41% (19)   | 14% (216)    |
|                                               |     |               | *            | *            | *            | *            | *          | *            |

Note: \* Difference between Yes and No  $p < 0.05$ .

**Table S2.** Bad sleep quality in relation to noise from combined sources, by three different measures of access to quiet side.

| <b>L<sub>Aeq24h</sub> dB(A)<br/>COMBINED</b>  |     | <b>&lt;40</b> | <b>40–44</b> | <b>45–49</b> | <b>50–54</b> | <b>55–59</b> | <b>≥60</b> | <b>Total</b> |
|-----------------------------------------------|-----|---------------|--------------|--------------|--------------|--------------|------------|--------------|
| Window(s)<br>facing green<br>space            | no  | 21% (4)       | 16% (13)     | 16% (25)     | 24% (45)     | 32% (62)     | 24% (12)   | 23% (161)    |
|                                               | yes | 9% (8)        | 12% (48)     | 18% (82)     | 20% (84)     | 22% (85)     | 25% (17)   | 18% (324)    |
|                                               |     |               |              |              |              | *            |            | *            |
| Bedroom<br>window facing<br>green space       | no  | 14% (4)       | 17% (18)     | 19% (41)     | 23% (58)     | 29% (81)     | 26% (20)   | 23% (222)    |
|                                               | yes | 10% (8)       | 12% (42)     | 17% (66)     | 20% (71)     | 21% (63)     | 23% (10)   | 17% (260)    |
|                                               |     |               |              |              |              | *            |            | *            |
| Subjective access<br>to quiet indoor<br>space | no  | 15% (2)       | 16% (12)     | 24% (53)     | 27% (74)     | 28% (90)     | 27% (20)   | 26% (251)    |
|                                               | yes | 10% (10)      | 12% (49)     | 14% (53)     | 16% (55)     | 21% (56)     | 22% (10)   | 15% (233)    |
|                                               |     |               |              | *            | *            | *            |            | *            |

Note: \* Difference between Yes and No  $p < 0.05$ .

**Table S3.** Concentration difficulties in relation to noise from combined sources, by three different measures of access to quiet side.

| <b>LAeq24h dB(A)</b>                    |     | <b>&lt;40</b> | <b>40–44</b> | <b>45–49</b> | <b>50–54</b> | <b>55–59</b> | <b>≥60</b> | <b>Total</b> |
|-----------------------------------------|-----|---------------|--------------|--------------|--------------|--------------|------------|--------------|
| <b>COMBINED</b>                         |     |               |              |              |              |              |            |              |
| Window(s) facing green space            | no  | 26% (5)       | 18% (15)     | 27% (42)     | 25% (47)     | 33% (64)     | 33% (16)   | 27% (189)    |
|                                         | yes | 17% (15)      | 16% (63)     | 20% (91)     | 21% (89)     | 23% (89)     | 25% (17)   | 20% (364)    |
|                                         |     |               |              |              |              | *            |            | *            |
| Bedroom window facing green space       | no  | 18% (5)       | 18% (20)     | 24% (52)     | 27% (67)     | 30% (85)     | 32% (24)   | 26% (253)    |
|                                         | yes | 19% (15)      | 16% (56)     | 21% (79)     | 19% (69)     | 22% (66)     | 23% (10)   | 19% (295)    |
|                                         |     |               |              |              | *            | *            |            | *            |
| Subjective access to quiet indoor space | no  | 15% (2)       | 25% (18)     | 29% (63)     | 26% (72)     | 32% (103)    | 28% (21)   | 29% (279)    |
|                                         | yes | 20% (19)      | 15% (59)     | 18% (68)     | 19% (64)     | 18% (49)     | 28% (13)   | 18% (272)    |
|                                         |     |               |              | *            | *            | *            | *          | *            |

Note: \* Difference between Yes and No  $p < 0.05$ .

© 2015 by the authors; licensee MDPI, Basel, Switzerland. This article is an open access article distributed under the terms and conditions of the Creative Commons Attribution license (<http://creativecommons.org/licenses/by/4.0/>).
